# Supplementary material for: Alignment of 1000 Genomes Project reads to reference assembly GRCh38
Source: PubMed Central journal article supplement (PMC5522380; doi:10.1093/gigascience/gix038), 2017-05-20
Supplement: gix038_giga-d-17-00028_original-submission.pdf [file gix038_giga-d-17-00028_original-submission.pdf]

|                                                      |                                                                                                                                                                                                                                                                                                                                                                                                                                                                                                                                                                                                                                                                                                                                                                                                                                                                                                                                                                                                                                                                                                                                                                                                                                                                                                                                                                                                                                                                                                                                                                                                                                                                  |                 |
|------------------------------------------------------|------------------------------------------------------------------------------------------------------------------------------------------------------------------------------------------------------------------------------------------------------------------------------------------------------------------------------------------------------------------------------------------------------------------------------------------------------------------------------------------------------------------------------------------------------------------------------------------------------------------------------------------------------------------------------------------------------------------------------------------------------------------------------------------------------------------------------------------------------------------------------------------------------------------------------------------------------------------------------------------------------------------------------------------------------------------------------------------------------------------------------------------------------------------------------------------------------------------------------------------------------------------------------------------------------------------------------------------------------------------------------------------------------------------------------------------------------------------------------------------------------------------------------------------------------------------------------------------------------------------------------------------------------------------|-----------------|
| <b>Manuscript Number:</b>                            | GIGA-D-17-00028                                                                                                                                                                                                                                                                                                                                                                                                                                                                                                                                                                                                                                                                                                                                                                                                                                                                                                                                                                                                                                                                                                                                                                                                                                                                                                                                                                                                                                                                                                                                                                                                                                                  |                 |
| <b>Full Title:</b>                                   | Alignment of 1000 Genomes Project Reads to Reference Assembly GRCh38                                                                                                                                                                                                                                                                                                                                                                                                                                                                                                                                                                                                                                                                                                                                                                                                                                                                                                                                                                                                                                                                                                                                                                                                                                                                                                                                                                                                                                                                                                                                                                                             |                 |
| <b>Article Type:</b>                                 | Data Note                                                                                                                                                                                                                                                                                                                                                                                                                                                                                                                                                                                                                                                                                                                                                                                                                                                                                                                                                                                                                                                                                                                                                                                                                                                                                                                                                                                                                                                                                                                                                                                                                                                        |                 |
| <b>Funding Information:</b>                          | Wellcome Trust (WT085532)                                                                                                                                                                                                                                                                                                                                                                                                                                                                                                                                                                                                                                                                                                                                                                                                                                                                                                                                                                                                                                                                                                                                                                                                                                                                                                                                                                                                                                                                                                                                                                                                                                        | Dr. Paul Flicek |
|                                                      | Wellcome Trust (WT095908)                                                                                                                                                                                                                                                                                                                                                                                                                                                                                                                                                                                                                                                                                                                                                                                                                                                                                                                                                                                                                                                                                                                                                                                                                                                                                                                                                                                                                                                                                                                                                                                                                                        | Dr. Paul Flicek |
|                                                      | Wellcome Trust (WT104947)                                                                                                                                                                                                                                                                                                                                                                                                                                                                                                                                                                                                                                                                                                                                                                                                                                                                                                                                                                                                                                                                                                                                                                                                                                                                                                                                                                                                                                                                                                                                                                                                                                        | Dr. Paul Flicek |
| <b>Abstract:</b>                                     | <p><b>Background</b></p> <p>The 1000 Genomes Project produced more than 100 trillion basepairs of short read sequence from more than 2600 samples in 26 populations over a period of five years. In its final phase, the project released over 85 million genotyped and phased variants on human reference genome assembly GRCh37. An updated reference assembly, GRCh38, was released in late 2013, but there was insufficient time for the final phase of the project analysis to change to the new assembly. Although it is possible to lift the coordinates of the 1000 Genomes project variants to the new assembly, this is a potentially error prone process as coordinate remapping is most appropriate only for non-repetitive regions of the genome and those that did not see significant change between the two assemblies. It will also miss variants in any region that was that is newly added to GRCh38. Thus, to produce the highest quality variants and genotypes on GRCh38, the best strategy is to realign the reads and recall the variants based on the new alignment.</p> <p><b>Findings</b></p> <p>As the first step of variant calling for the 1000 Genomes Project data, we have finished remapping all of the 1000 Genomes sequence reads to GRCh38 with ALT-aware BWA-MEM. The resulting alignments are available as CRAM, a reference-based sequence compression format.</p> <p><b>Conclusions</b></p> <p>The data have been released on our FTP site and are also available from European Nucleotide Archive (ENA) to facilitate researchers to discover variants on the primary sequences and alternative contigs of GRCh38.</p> |                 |
| <b>Corresponding Author:</b>                         | Paul Flicek                                                                                                                                                                                                                                                                                                                                                                                                                                                                                                                                                                                                                                                                                                                                                                                                                                                                                                                                                                                                                                                                                                                                                                                                                                                                                                                                                                                                                                                                                                                                                                                                                                                      |                 |
|                                                      | UNITED KINGDOM                                                                                                                                                                                                                                                                                                                                                                                                                                                                                                                                                                                                                                                                                                                                                                                                                                                                                                                                                                                                                                                                                                                                                                                                                                                                                                                                                                                                                                                                                                                                                                                                                                                   |                 |
| <b>Corresponding Author Secondary Information:</b>   |                                                                                                                                                                                                                                                                                                                                                                                                                                                                                                                                                                                                                                                                                                                                                                                                                                                                                                                                                                                                                                                                                                                                                                                                                                                                                                                                                                                                                                                                                                                                                                                                                                                                  |                 |
| <b>Corresponding Author's Institution:</b>           |                                                                                                                                                                                                                                                                                                                                                                                                                                                                                                                                                                                                                                                                                                                                                                                                                                                                                                                                                                                                                                                                                                                                                                                                                                                                                                                                                                                                                                                                                                                                                                                                                                                                  |                 |
| <b>Corresponding Author's Secondary Institution:</b> |                                                                                                                                                                                                                                                                                                                                                                                                                                                                                                                                                                                                                                                                                                                                                                                                                                                                                                                                                                                                                                                                                                                                                                                                                                                                                                                                                                                                                                                                                                                                                                                                                                                                  |                 |
| <b>First Author:</b>                                 | Xiangqun Zheng-Bradley                                                                                                                                                                                                                                                                                                                                                                                                                                                                                                                                                                                                                                                                                                                                                                                                                                                                                                                                                                                                                                                                                                                                                                                                                                                                                                                                                                                                                                                                                                                                                                                                                                           |                 |
| <b>First Author Secondary Information:</b>           |                                                                                                                                                                                                                                                                                                                                                                                                                                                                                                                                                                                                                                                                                                                                                                                                                                                                                                                                                                                                                                                                                                                                                                                                                                                                                                                                                                                                                                                                                                                                                                                                                                                                  |                 |
| <b>Order of Authors:</b>                             | Xiangqun Zheng-Bradley                                                                                                                                                                                                                                                                                                                                                                                                                                                                                                                                                                                                                                                                                                                                                                                                                                                                                                                                                                                                                                                                                                                                                                                                                                                                                                                                                                                                                                                                                                                                                                                                                                           |                 |
|                                                      | Ian Streeter                                                                                                                                                                                                                                                                                                                                                                                                                                                                                                                                                                                                                                                                                                                                                                                                                                                                                                                                                                                                                                                                                                                                                                                                                                                                                                                                                                                                                                                                                                                                                                                                                                                     |                 |
|                                                      | Susan Fairley                                                                                                                                                                                                                                                                                                                                                                                                                                                                                                                                                                                                                                                                                                                                                                                                                                                                                                                                                                                                                                                                                                                                                                                                                                                                                                                                                                                                                                                                                                                                                                                                                                                    |                 |
|                                                      |                                                                                                                                                                                                                                                                                                                                                                                                                                                                                                                                                                                                                                                                                                                                                                                                                                                                                                                                                                                                                                                                                                                                                                                                                                                                                                                                                                                                                                                                                                                                                                                                                                                                  |                 |

|                                                                                                                                                                                                                                                                                                                                                                                                                                                                                                                                     |                                 |
|-------------------------------------------------------------------------------------------------------------------------------------------------------------------------------------------------------------------------------------------------------------------------------------------------------------------------------------------------------------------------------------------------------------------------------------------------------------------------------------------------------------------------------------|---------------------------------|
|                                                                                                                                                                                                                                                                                                                                                                                                                                                                                                                                     | David Richardson                |
|                                                                                                                                                                                                                                                                                                                                                                                                                                                                                                                                     | Laura Clarke                    |
|                                                                                                                                                                                                                                                                                                                                                                                                                                                                                                                                     | Paul Flicek                     |
|                                                                                                                                                                                                                                                                                                                                                                                                                                                                                                                                     | 1000 Genomes Project Consortium |
| <b>Order of Authors Secondary Information:</b>                                                                                                                                                                                                                                                                                                                                                                                                                                                                                      |                                 |
| <b>Opposed Reviewers:</b>                                                                                                                                                                                                                                                                                                                                                                                                                                                                                                           |                                 |
| <b>Additional Information:</b>                                                                                                                                                                                                                                                                                                                                                                                                                                                                                                      |                                 |
| <b>Question</b>                                                                                                                                                                                                                                                                                                                                                                                                                                                                                                                     | <b>Response</b>                 |
| Are you submitting this manuscript to a special series or article collection?                                                                                                                                                                                                                                                                                                                                                                                                                                                       | No                              |
| <p><b>Experimental design and statistics</b></p> <p>Full details of the experimental design and statistical methods used should be given in the Methods section, as detailed in our <a href="#">Minimum Standards Reporting Checklist</a>. Information essential to interpreting the data presented should be made available in the figure legends.</p> <p>Have you included all the information requested in your manuscript?</p>                                                                                                  | Yes                             |
| <p><b>Resources</b></p> <p>A description of all resources used, including antibodies, cell lines, animals and software tools, with enough information to allow them to be uniquely identified, should be included in the Methods section. Authors are strongly encouraged to cite <a href="#">Research Resource Identifiers</a> (RRIDs) for antibodies, model organisms and tools, where possible.</p> <p>Have you included the information requested as detailed in our <a href="#">Minimum Standards Reporting Checklist</a>?</p> | Yes                             |
| <p><b>Availability of data and materials</b></p> <p>All datasets and code on which the conclusions of the paper rely must be either included in your submission or deposited in <a href="#">publicly available repositories</a> (where available and ethically appropriate), referencing such data using a unique identifier in the references and in the “Availability of Data and Materials” section of your manuscript.</p>                                                                                                      | Yes                             |

Have you have met the above requirement as detailed in our [Minimum Standards Reporting Checklist](#)?

## Alignment of 1000 Genomes Project Reads to Reference Assembly GRCh38

Xiangqun Zheng-Bradley, Ian Streeter, Susan Fairley, David Richardson, Laura Clarke, Paul Flicek and the 1000 Genomes Project Consortium

European Molecular Biology Laboratory, European Bioinformatics Institute,  
Wellcome Genome Campus, Hinxton, Cambridge CB10 1SD, United Kingdom

Emails:

[Zheng\\_holly@hotmail.com](mailto:Zheng_holly@hotmail.com) (XZ)

[streeter@ebi.ac.uk](mailto:streeter@ebi.ac.uk) (IS)

[fairley@ebi.ac.uk](mailto:fairley@ebi.ac.uk) (SF)

[davidr@ebi.ac.uk](mailto:davidr@ebi.ac.uk) (DR)

[laura@ebi.ac.uk](mailto:laura@ebi.ac.uk) (LC)

[flicek@ebi.ac.uk](mailto:flicek@ebi.ac.uk) (PF)

Corresponding author: Paul Flicek

1  
2  
3  
4  
5  
6  
7  
8  
9  
10  
11  
12  
13  
14  
15  
16  
17  
18  
19  
20  
21  
22  
23  
24  
25  
26  
27  
28  
29  
30  
31  
32  
33  
34  
35  
36  
37  
38  
39  
40  
41  
42  
43  
44  
45  
46  
47  
48  
49  
50  
51  
52  
53  
54  
55  
56  
57  
58  
59  
60  
61  
62  
63  
64  
65

1  
2  
3  
4 **Abstract**

5  
6  
7 Background

8  
9 The 1000 Genomes Project produced more than 100 trillion basepairs of short read  
10 sequence from more than 2600 samples in 26 populations over a period of five  
11 years. In its final phase, the project released over 85 million genotyped and phased  
12 variants on human reference genome assembly GRCh37. An updated reference  
13 assembly, GRCh38, was released in late 2013, but there was insufficient time for the  
14 final phase of the project analysis to change to the new assembly. Although it is  
15 possible to lift the coordinates of the 1000 Genomes project variants to the new  
16 assembly, this is a potentially error prone process as coordinate remapping is most  
17 appropriate only for non-repetitive regions of the genome and those that did not see  
18 significant change between the two assemblies. It will also miss variants in any  
19 region that was that was newly added to GRCh38. Thus, to produce the highest  
20 quality variants and genotypes on GRCh38, the best strategy is to realign the reads  
21 and recall the variants based on the new alignment.  
22  
23  
24  
25

26  
27 Findings

28  
29 As the first step of variant calling for the 1000 Genomes Project data, we have  
30 finished remapping all of the 1000 Genomes sequence reads to GRCh38 with ALT-  
31 aware BWA-MEM. The resulting alignments are available as CRAM, a reference-  
32 based sequence compression format.  
33  
34

35  
36 Conclusions

37  
38 The data have been released on our FTP site and are also available from European  
39 Nucleotide Archive (ENA) to facilitate researchers discovering variants on the  
40 primary sequences and alternative contigs of GRCh38.  
41  
42

43  
44 **Keywords**

45  
46 alignment, reference genome, GRCh38, sequence reads, read mapping  
47  
48  
49  
50  
51  
52  
53  
54  
55  
56  
57  
58  
59  
60  
61  
62  
63  
64  
65

## Data Description

### **Background**

The 1000 Genomes Project consortium collected and sequenced more than 2600 samples from 26 populations between 2008 and 2013 in order to produce a deep catalogue of human genomic variation. All collected samples were sequenced with two strategies: low coverage whole genome sequencing (WGS) and whole exome sequencing (WES). Sequence reads were aligned to the GRCh37 human reference genome assembly and various algorithms were used to make variant calls from the data. The project released variant calls in phases; the final release included 85 millions variants of various types and phased haplotypes for those variants [1]. The dataset has been widely used by the science community for genotype imputation and many other applications [2].

The Genome Reference Consortium (GRC) released the updated GRCh38 version of the human reference assembly in late 2013. This was the first major update to the reference genome (i.e. one that changes chromosome coordinates) since 2009 [3]. Major improvements in this new release include:

1. Correcting erroneous bases, updating the tiling path in highly variable regions and closing sequence gaps.
2. Introducing centromere sequence to replace mega-base stretches of Ns in earlier assemblies. The centromeres are created from a model of the estimated number and order of centromeric repeats.
3. Substantially increasing the number of alternative haplotypes associated with the assembly. Following the assembly model introduced with GRCh37 that also supported updates and patches, GRCh38 introduced 261 alternative scaffolds (ALT) to represent diverse haplotypes in 178 chromosomal regions.

With the release of the new assembly, dbSNP lifted all the 1000 Genomes variants—as well as the rest of the data in the archive—to GRCh38 coordinates and these are distributed on the 1000 Genomes FTP site ([ftp://ftp.1000genomes.ebi.ac.uk/vol1/ftp/release/20130502/supporting/GRCh38\\_positions](ftp://ftp.1000genomes.ebi.ac.uk/vol1/ftp/release/20130502/supporting/GRCh38_positions)). This remapping is based on a whole genome alignment between GRCh37 and GRCh38 and is expected to be highly accurate for sites found in regions of the genome that did not change between assembly versions. However, variant sites in repetitive regions or regions that saw sequence or structural changes may be placed inaccurately or not be placed at all. The remapping approach will also be ineffective for any variants that should have been called in regions of the genome missing from the previous reference and the absence of these regions may have led to mis-mapping of reads and false positives [4]. To address these potential problems and to create the best possible representation of the 1000 Genomes data on the GRCh38 assembly, we will recall variants and genotypes based on a new underlying read mapping rather than simply distribute the results of a variant lift over.

1  
2  
3  
4 The first step in recalling the 1000 Genomes variants is mapping the reads to the  
5 new reference genome. For the alignment, we chose a new version of BWA-MEM  
6 that is ALT-aware and can take advantage of the complete GRCh38 reference  
7 genome, rather than just the primary chromosomes [5]. The alignments were  
8 improved using the same steps as the 1000 Genomes Project pipeline (base quality  
9 recalibration, indel realignment and duplicate marking) then converted into CRAM  
10 format to reduce the disk footprint of the alignments. CRAM uses a reference-based  
11 compression approach resulting in significantly smaller files [6]. These alignments  
12 represent the first large-scale open dataset in this format and should be a useful  
13 resource for community efforts to adapt tools to the CRAM format.  
14  
15  
16  
17

18 A major use of this alignment data set is variant discovery across all GRCh38  
19 sequences. Compared to the previous 1000 Genomes alignment releases, a unique  
20 feature of this data set is read mapping to ALT contigs and HLA sequences,  
21 facilitating variant discovery and analysis of the ALT sequences and better HLA  
22 typing. There are many other possible uses, such as evaluating genome accessibility.  
23 We have deposited the CRAM files into ENA to make this resource widely available.  
24  
25  
26

## 27 **Methods**

### 28 29 1. Preparation of the input files

30  
31 The methods used for sample collection, library construction and sequencing are  
32 described in the previous 1000 Genomes Project publications [1, 7, 8]. The  
33 sequence reads used for the alignments were retrieved from ENA as FASTQ files;  
34 sample meta data such as study names, population, as well as alignment results are  
35 listed in Supplemental Table 1. The GRCh38 alignments used the same criteria as the  
36 final phase of the 1000 Genomes Project to select the read data for analysis, namely  
37 only sequence data generated by Illumina sequencing and only reads longer than  
38 70bps (WGS) and 68bps (WES). All files were verified to be valid FASTQ format. A  
39 complete list of input sequence data and runs used in the alignment can be found on  
40 our FTP site  
41 ([ftp://ftp.1000genomes.ebi.ac.uk/vol1/ftp/data\\_collections/1000\\_genomes\\_project](ftp://ftp.1000genomes.ebi.ac.uk/vol1/ftp/data_collections/1000_genomes_project/1000genomes.sequence.index)  
42 /1000genomes.sequence.index)  
43  
44  
45  
46  
47

### 48 2. Alignment of reads to reference genome

49  
50 The full analysis set of GRCh38 (accession GCA\_000001405.15) was used for this  
51 alignment. This includes the primary GRCh38 sequences (autosomes and  
52 chromosome X and Y), mitochondria genome, un-localized scaffolds which belong to  
53 a chromosome without a definitive location and order, unplaced scaffolds which are  
54 in the assembly without a chromosome assignment, the Epstein-Barr virus (EBV)  
55 sequence, ALT contigs, and the decoy sequences. The decoy and EBV sequences are  
56 not part of the human genome assembly but they are included in the reference to  
57 serve as read mapping “sinks” for highly repetitive sequences that are difficult to  
58 align and foreign reads that are often present in sequencing samples. In addition to  
59  
60  
61  
62  
63  
64  
65

1  
2  
3  
4 GCA\_000001405.15, more than 500 HLA sequences were included as part of the  
5 reference assembly to help HLA typing. The reference data set was unpacked from  
6 bwakit-0.7.12 (<https://github.com/lh3/bwa/tree/master/bwakit>) developed by  
7 Heng Li and is available from  
8 ftp://ftp.1000genomes.ebi.ac.uk/vol1/ftp/technical/reference/GRCh38\_reference\_  
9 genome/.

10  
11  
12  
13 Aligning to the complete GRCh38 reference assembly must allow multiple mappings  
14 to accommodate ALT sequences otherwise BWA-MEM's random assignment of  
15 reads to one possible location would lose information. These ALT contigs are given  
16 chromosomal context through alignment to the primary reference. The ALT contigs  
17 represent 109Mb of sequence, much of which is near identical to the primary  
18 reference. The initial mapping gives these multi-mapping reads a mapping quality of  
19 zero. The alt aware version of BWA-MEM adjusts the mapping quality for such reads  
20 across non-redundant primary sequence as a post-processing step. It also records  
21 the alignments as separate lines in the output BAM files rather than in the XA tag of  
22 a primary alignment location. Thus variants on ALT contigs can be used in variant  
23 calling independently from the primary sequences.

24  
25  
26  
27  
28 Our alignment pipeline was run in a high throughput compute environment  
29 managed using the eHive workflow system [9]. The pipeline split run-level FASTQ  
30 files into chunks with a maximum size of 5 million reads to ensure high efficiency.  
31 Sequence reads were aligned to GRCh38 chunk by chunk (Figure 1 left panel) using  
32 the following command:

33  
34  
35 ``bwa mem -t 1 -B 4 -O 6 -E 1 -M -R $rg_string $reference_fasta_file $fastq_file(1)`  
36 `$fastq_file(2) | k8 bwa-postalt.js -p $prefix_hla_hit $reference_fasta_file.alt | samtools`  
37 `view -1 - > $bam_file``  
38

39  
40 Subsequently, chunk level BAMs were sorted and merged into run-level BAMs using  
41 BioBamBam [10]. Sequence reads from low coverage WGS and WES were aligned to  
42 GRCh38 separately.

### 43 44 45 3. BAM improvements

46  
47  
48 BAM improvement steps were run to ensure the alignments are suitable for variant  
49 calling purposes (Figure 1, middle panel). The 1000 Genomes Project included  
50 sequencing data from different sequence centers and different versions of the  
51 Illumina platform. To manage this heterogeneity the 1000 Genomes Project  
52 developed a base quality recalibration method to reduce center/sequencing  
53 machine specific bias [11] and this was applied to both Phase 1 and Phase 3 of the  
54 1000 Genomes Project alignments. To recalibrate the aligned base qualities, we used  
55 GATK with dbSNP release 142 as the known SNPs. Command lines are as follows:

56  
57  
58  
59 ``java $jvm_args -jar GenomeAnalysisTK.jar -T BaseRecalibrator -nt 1 -l INFO -cov`  
60 `ReadGroupCovariate -cov QualityScoreCovariate -cov CycleCovariate -cov`  
61  
62  
63  
64  
65



```
ContextCovariate -R $reference_fasta -o $recal_data.table -I $bam_file -knownSites $known_snps_from_dbSNP142`
```

```
`java $jvm_args -jar GenomeAnalysisTK.jar -T PrintReads -I INFO -R $reference_fasta -o $recalibrated_bam -I $bam_file -BQSR $recal_data.table --disable_bam_indexing`
```

The 1000 Genomes Project also discovered an excess of false positive variant calls near indels due to alignment parameters that favor mismatches over gaps. The GATK package 'IndelRealigner' was developed to address this issue and improve alignments around indels. We used two sets of known indels, mapped to GRCh38 coordinates, for this process: (i) the 1000 Genomes Project phase3 indels produced by Shapeit2 with coordinates lifted to GRCh38 by NCBI's Remapper; and (ii) the Mills and Devine's indel set [12], lifted to GRCh38 by CrossMap [13] and provided by Alison Meynert from IGMM in Edinburgh (personal communication). Indel realignment used the following command:

```
`java $jvm_args -jar GenomeAnalysisTK.jar -T IndelRealigner -R $reference_fasta -I $bam_file -o $realigned_bam_file -targetIntervals $intervals_file -known $known_indels_file(s) -LOD 0.4 -model KNOWNS_ONLY -compress 0 --disable_bam_indexing`
```

Lastly, PCR-introduced duplicates were marked at library level using "markduplicates" function in BioBamBam using the following command line:

```
`bammarkduplicates I=$input_bam O=$output_bam index=1 rmdup=0`
```

After improvement, the run-level BAMs were sorted and merged into sample-level BAMs.

#### 4. Compressing BAMs to CRAMs

The improved, sample-level BAMs were then compressed to lossy CRAMs using cramtools-3.0 for distribution.

CRAM is a reference-based compression scheme designed for DNA sequence data and initially described by His-Yang Fritz *et al.* in 2011 [6]. Briefly, sequences are aligned to a well-established reference assembly and, rather than storing every aligned base, only bases that are different from the reference are stored. Further file size reduction is achieved by specific lossy techniques in which quality scores, read names and other alignment tags are stored at a lower resolution or dropped. CRAM is natively supported by HTSlib and Picard, as well as the java toolkit, CRAMTools. The format is also accepted by the ENA as a sequencing data format and is being routinely submitted to the archive.

In the CRAM files for the 1000 Genomes GRCh38 alignments, the quality score resolution was reduced by modifying the initial score distribution to one based on

1  
2  
3  
4 the current Illumina 8-bin scheme  
5 ([http://www.illumina.com/content/dam/illumina-support/documents/myillumina/e96e90a9-698d-4a0b-9b33-9445c5ad723d/whitepaper\\_datacompression.pdf](http://www.illumina.com/content/dam/illumina-support/documents/myillumina/e96e90a9-698d-4a0b-9b33-9445c5ad723d/whitepaper_datacompression.pdf)). Indeed, all data reduction in the  
9 creation of the CRAM files was done in a controlled manner using the command line  
10 below to ensure no negative impact on downstream variant calling. Given the  
11 support of the major NGS toolkits and sequence archives described above, these  
12 data present a ideal opportunity for the community to move to this newer, more  
13 space efficient, format.  
14

```
15  
16  
17 java cramtools-3.0.jar cram --input-bam-file $input_bam --output-cram-file  
18 $output_cram --capture-all-tags --ignore-tags OQ:CQ:BQ --preserve-read-names --  
19 lossy-quality-score-spec *8 --reference-fasta-file $reference_fasta`  
20
```

## 21 5. Code availability

22  
23  
24 The eHive pipeline management software and the pipeline components for every  
25 part of the multi-step alignment process (see Figure 1) are available for download.  
26 Running in parallel on a high throughput compute cluster is required to ensure  
27 completion in a reasonable timeframe.  
28  
29

| 30 Software  | 31 Installation Instructions                                                                                                  | 32 Codebase                                                                                           |
|--------------|-------------------------------------------------------------------------------------------------------------------------------|-------------------------------------------------------------------------------------------------------|
| 33 eHive     | <a href="http://www.ensembl.org/info/docs/api/api_git.html">http://www.ensembl.org/info/docs/api/api_git.html</a>             | <a href="https://github.com/Ensembl/ensembl-compara">https://github.com/Ensembl/ensembl-compara</a>   |
| 34 BWA-MEM   | <a href="https://github.com/lh3/bwa/blob/master/bwakit/README.md">https://github.com/lh3/bwa/blob/master/bwakit/README.md</a> | <a href="https://github.com/lh3/bwa">https://github.com/lh3/bwa</a>                                   |
| 35 BioBamBam | <a href="https://github.com/gt1/biobamba2/blob/master/README.md">https://github.com/gt1/biobamba2/blob/master/README.md</a>   | <a href="https://github.com/gt1/biobamba2">https://github.com/gt1/biobamba2</a>                       |
| 36 GATK      | <a href="https://www.broadinstitute.org/gatk/download/">https://www.broadinstitute.org/gatk/download/</a>                     | <a href="https://github.com/broadgsa/gatk-protected/">https://github.com/broadgsa/gatk-protected/</a> |
| 37 CRAMTools | <a href="http://www.ebi.ac.uk/ena/software/cram-toolkit">http://www.ebi.ac.uk/ena/software/cram-toolkit</a>                   | <a href="https://github.com/enasequence/cramtools">https://github.com/enasequence/cramtools</a>       |

## 44 **Technical Validation**

45  
46  
47  
48 To ensure the alignments are high quality, we characterized them and made  
49 comparisons between these alignments and the final alignments produced by the  
50 1000 Genomes project on GRCh37.  
51

### 52 1. Comparison to 1000 Genomes Phase 3 alignments

53  
54  
55  
56 The final phase 3 alignments used a very similar pipeline including the use of a  
57 mapping reference comprising human decoy sequence to reduce the rate of mis-  
58  
59  
60  
61  
62  
63  
64  
65

1  
2  
3  
4 mapped reads and miscalled variants. The phase3 alignment to GRCh37 was  
5 performed using standard BWA v0.5.9 and, similar to the process described above,  
6 the alignments underwent base quality recalibration, indel realignment, and  
7 duplicate removal. Thus, the first phase 3 alignments are a tested, high-quality  
8 dataset [1].  
9

10  
11 As summarized in Table 1, the alignment pipeline started with 63,744 gigabases of  
12 low coverage sequence and 28,152 gigabases of WES sequence. The total amounts  
13 of aligned sequence in the final CRAM files are slightly larger—66,437 and 30,901  
14 gigabases, respectively—because some of the reads are mapped to multiple  
15 locations such as the primary chromosomal region and its corresponding ALT  
16 contig. A higher percentage of reads mapped to GRCh38 (96.2% for low coverage  
17 WGS and 97.5% for WES) compared to GRCh37 (92.6% and 93.6%). The percentage  
18 of duplicated bases in the GRCh38 alignments are also lower than those of GRCh37  
19 alignment: 3.6% vs. 4.1% for the low coverage and 11.9% vs. 13.1% for WES. This  
20 difference is likely due to a combination of the improved assembly and a different  
21 software package for marking PCR duplications (BioBamBam here and GATK for  
22 GRCh37). The coverage statistics noted above and presented in Table 1 were  
23 calculated using GATK calculateHsMetrics function and are very similar for both  
24 GRCh37 and GRCh38.  
25  
26  
27  
28  
29

30 Taken together, these results suggest the GRCh38 alignment data described here is  
31 largely comparable to the tested, high quality alignment to GRCh37.  
32  
33

## 34 2. Mapping quality and read depth 35

36 We analyzed mapping quality and total read depth for the low coverage WGS across  
37 chromosomes using BamUtil (Figure 2;  
38 <http://genome.sph.umich.edu/wiki/BamUtil>). Except for chromosome Y, the  
39 mapping quality is very similar across all chromosomes (Figure 2a). The lower value  
40 on chromosome Y is mainly due to larger than average number of hits with mapping  
41 quality zero (Figure 2b). This, in turn, is due to the chromosome Y sequence, which  
42 contains long stretches of palindromic repetitive sequences [14] and reads mapping  
43 to multiple locations are assigned mapping quality of zero.  
44  
45  
46  
47

48 The total read depth of all samples is plotted by chromosome in Figure 2c. For  
49 autosomes, the mapped reads from more than 2600 samples result in an average  
50 total depth of 20,360x, with very small variations (Figure 2c). The sex ratio in the  
51 sample collection is 51/49 female to male, which should result in a total depth for  
52 the non-PAR regions of the sex chromosomes of approximately three quarters of the  
53 autosome depth on the X chromosome and one quarter of the autosome depth on  
54 chromosome Y. However, the observed read depths are 14622x and 13180x for X  
55 and Y, respectively, which is close to the expected 15000x for the non-PAR region of  
56 chromosome X, but much higher than the 5000x expected for chromosome Y (Figure  
57 2c). An analysis across the length of the Y chromosome, shows that the majority  
58 (70%) of Y is between 4000-6000x, with only 6% covered at 10000x or higher  
59  
60  
61  
62  
63  
64  
65

1  
2  
3  
4 (Figure 3). This skewed average coverage is also linked to the repetitive sequences  
5 found in chromosome Y. Chromosome 21 also has an enrichment of sites with  
6 mapping quality of zero (Figure 2b) and slightly higher read depth compared to the  
7 other autosomes (Figure 2c).  
8  
9

### 10 3. Creation and analysis of accessibility masks 11

12  
13 We used the results of the BamUtil analysis above to determine which regions of the  
14 GRCh38 assembly are accessible for accurate variant calling by short read  
15 sequencing. Accessible regions have a combination of reasonable total read depth  
16 and mapped reads with reasonable mapping quality. The mean depth across all  
17 samples (20,360x) and the percentage of mapping quality zero reads was used to  
18 determine what is considered ‘accessible’.  
19  
20

21 Two different genome accessibility masks were produced in the same manner as the  
22 final GRCh37 alignments and using the same criteria as those masks. The pilot mask  
23 followed the same standards as the 1000 Genomes pilot analysis [8] allowing  
24 between a two fold change in coverage (i.e. coverage between 10,180x and 40,720x)  
25 required 20% or fewer reads with mapping quality zero. The strict mask, which was  
26 used for the 1000 Genomes phase 3 analysis [1], accepted coverage values between  
27 10,180x and 30,540x and fewer than 0.1% of reads with mapping quality zero. The  
28 strict mask carried the additional criteria that all accessible base positions have  
29 average or higher mapping quality, in this instance 56; a value based on the  
30 autosomes.  
31  
32  
33  
34

35 Comparing the accessibility results (Table 2), GRCh38 has more accessible bases for  
36 both masks than GRCh37: 89.0% vs 88.2% using the pilot mask and 74.1% vs 70.5%  
37 using the strict mask. Additionally, GRCh38 has fewer bases in the assembly  
38 marked as N, 5.3% versus 7.7%, as a result of the 60Mb of GRCh37 gaps that were  
39 filled or closed in the new assembly.  
40  
41

42 We categorized sites in the genome that were masked by whether the base’s  
43 coverage was too low (L), too high (H), had too many mapping quality zero reads (Z)  
44 or—for the strict mask only—didn’t meet the average mapping quality criteria (Q).  
45 For the majority of these categories, the GRCh38 alignment is comparable with the  
46 GRCh37 alignment. In both cases, the major reason for a base to be in the strict  
47 mask, but not the pilot mask was reads with mapping quality zero (Table 2). The  
48 largest difference between the alignments is the percentage of sites failed because  
49 the mapped reads have a mapping quality smaller than the cutoff in the strict mask,  
50 which dropped from 3% in the GRCh37 mask to 0.03% in the GRCh38 mask. This  
51 may be due to the post-processing steps taken by BWA-MEM to adjust mapping  
52 quality for reads mapping to both the primary reference and the alternative  
53 sequence. Regardless, the accessibility mask creation and analysis suggests that the  
54 GRCh38 alignments are as good as, if not better than, the GRCh37 alignments when  
55 comparing on the basis of alignment depth.  
56  
57  
58  
59  
60  
61  
62  
63  
64  
65

## Usage Notes

CRAM is a relatively new standard data format and we have included some tips about using these files effectively.

1. Create a local cache of the reference genome, in this case GRCh38, to increase performance

CRAM saves space compared to BAM in part by removing any reference base from the SAM records. Thus, HTSlib and other tools must have access to the reference sequence when necessary to present alignment records. A local cache of the reference sequence will significantly speed up this process. Indeed, HTSlib and other tools look first to a local cache, then the central CRAM reference registry to try and find the correct piece of sequence. This is done using MD5 or SHA1 checksums and in the case of the reference registry, using the following URL structure:

```
www.ebi.ac.uk/ena/cram/md5/<hashvalue>  
www.ebi.ac.uk/ena/cram/sha1/<hashvalue>
```

SAMtools can create a local copy of this cache and remove the need to download the data the first time a read sequence is read by any of the tools. We summarize the process below and more information about it is available from [http://www.htslib.org/workflow/#mapping\\_to\\_cram](http://www.htslib.org/workflow/#mapping_to_cram).

- A) Download GRCh38 reference FASTA file from the FTP site

```
ftp://ftp.1000genomes.ebi.ac.uk/vol1/ftp/technical/reference/GRCh38_reference_ genome/GRCh38_full_analysis_set_plus_decoy_hla.fa
```

- B) Run `seq_cache_populate.pl` (provided in the standard SAMtools installation) to convert the reference FASTA into a directory tree with the reference sequence MD5 checksums.

```
'perl samtools/misc/seq_cache_populate.pl -root /path/to/cache /path/to/GRCh38_full_analysis_set_plus_decoy_hla.fa'
```

- C) Set the following environment variables needed by HTSlib and CRAMTools in order to read the cached genome. The CRAM reference registry is then only used if the given checksum is not founded in the cache location.

```
'export REF_PATH=/path/to/cache/%2s/%2s/%s:http://www.ebi.ac.uk/ena/cram/md5/%s'
```

```
'export REF_CACHE=/path/to/cache/%2s/%2s/%s'
```

1  
2  
3  
4 By default SAMtools and CRAMtools first check the reference MD5 sums (@SQ "M5"  
5 auxiliary tag) in the directory pointed to by \$REF\_PATH environment variable. If  
6 this is not available, they fall back to querying the CRAM reference genome server at  
7 EMBL-EBI and, if neither these are found, to the @SQ "UR" field.  
8  
9

10 Once these steps above are finished, the local cache is ready to be used to query data  
11 from a CRAM file.  
12  
13

## 14 2. Extracting data from CRAM files

15  
16

17 CRAM files can be read and processed via java and C APIs and various supporting  
18 tools. Example commands to view CRAM files or convert them to BAM are provided  
19 below.  
20  
21

22 Example: view chr22:1000000-1500000 from CRAM file using SAMtools (version  
23 1.2 or higher):  
24  
25

```
26 'samtools view $input.cram -h chr22:1000000-1500000 | less'
```

27

28 Example: convert CRAM file to BAM file using CRAMtools:  
29  
30

```
31 'java -jar cramtools-3.0.jar bam -I $input.cram -R $reference.fa -O $output.bam'
```

32  
33  
34  
35  
36  
37  
38  
39  
40  
41  
42  
43  
44  
45  
46  
47  
48  
49  
50  
51  
52  
53  
54  
55  
56  
57  
58  
59  
60  
61  
62  
63  
64  
65

1  
2  
3  
4  
5  
6  
7  
8  
9  
10  
11  
12  
13  
14  
15  
16  
17  
18  
19  
20  
21  
22  
23  
24  
25  
26  
27  
28  
29  
30  
31  
32  
33  
34  
35  
36  
37  
38  
39  
40  
41  
42  
43  
44  
45  
46  
47  
48  
49  
50  
51  
52  
53  
54  
55  
56  
57  
58  
59  
60  
61  
62  
63  
64  
65

### **Availability of supporting data**

All CRAM files supporting the results of this article are available in ENA and assigned accessions at both study and file levels. Study ERP013771 is the low coverage WGS dataset, which contains 2691 analyses with accessions in the format of ERZnnnnnn, each analysis corresponding to one sample-level CRAM file. Similarly, study ERP013770 is the WES dataset of 2692 samples, one for one analysis. All information is summarized in Supplemental Table 1.

1  
2  
3  
4 **List of abbreviations**  
5

6 WGS – whole genome sequence  
7 WES – whole exome sequence  
8 ENA - European Nucleotide Archive  
9 GRC - the Genome Reference Consortium  
10 ALT – alternative scaffold  
11 EBV - the Epstein-Barr virus  
12  
13  
14

15  
16 **Ethics approval and consent to participate**  
17

18  
19 All genome sequence data from the 1000 Genomes Project is consented for open  
20 analysis, publication and distribution. Samples, consent and ethics details are  
21 described in the previous 1000 Genomes Project publications [1, 7, 8].  
22  
23

24 **Consent for publication**  
25

26 Not applicable  
27  
28  
29

30 **Competing interests**  
31

32 P.F. is a member of the Scientific Advisory Board for Omicia, Inc.  
33  
34  
35

36 **Funding**  
37

38  
39 This work was funded by Wellcome Trust (grant numbers WT085532, WT095908  
40 and WT104947) and the European Molecular Biology Laboratory.  
41  
42

43 **Author contributions**  
44

45 X.Z.-B. carried out the remapping and most of the downstream analysis; I.S.  
46 developed the original FASTQ retrieval and eHive alignment pipelines, which were  
47 adapted by X.Z.-B. to work with the 1000 Genomes Project specifications and output  
48 CRAM files; S.F. compared the statistics of the alignment data on GRCh37 and  
49 GRCh38; D.R. developed modules to generate XML for data submission to ENA; L.C.  
50 and P.F. provided project management, guidance and ideas; X.Z.-B., L.C. and P.F.  
51 wrote the paper.  
52  
53  
54

55 **Acknowledgements**  
56

57 The authors acknowledge Shane McCarthy for sharing with us his experience on  
58 working with the 1000 Genome Project alignment pipeline; Vadim Zalunin and  
59 James Bonfield for their help with CRAM, CRAMTools, and HTSlib; Dylan Spalding  
60  
61  
62  
63  
64  
65



1  
2  
3  
4  
5  
6  
7  
8  
9  
10  
11  
12  
13  
14  
15  
16  
17  
18  
19  
20  
21  
22  
23  
24  
25  
26  
27  
28  
29  
30  
31  
32  
33  
34  
35  
36  
37  
38  
39  
40  
41  
42  
43  
44  
45  
46  
47  
48  
49  
50  
51  
52  
53  
54  
55  
56  
57  
58  
59  
60  
61  
62  
63  
64  
65

for providing coordinate lift data for known indels; Rasko Leinonen for assistance in submitting data the ENA and Heng Li for helpful discussions regarding the ALT-aware BWA-MEM.

## References

1. Genomes Project C, Auton A, Brooks LD *et al.* A global reference for human genetic variation. *Nature* 2015; 526:68-74.
2. Zheng-Bradley X, Flicek P. Applications of the 1000 Genomes Project resources. *Brief Funct Genomics* 2016.
3. Church DM, Schneider VA, Graves T *et al.* Modernizing reference genome assemblies. *PLoS Biol* 2011; 9:e1001091.
4. Schneider VA, Lindsay TG, Howe K *et al.* Evaluation of GRCh38 and de novo haploid genome assemblies demonstrates the enduring quality of the reference assembly. *bioRxiv* 2016.
5. Li H. Aligning sequence reads, clone sequences and assembly contigs with BWA-MEM. 2013; arXiv:1303.3997v2 [q-bio.GN].
6. Hsi-Yang Fritz M, Leinonen R, Cochrane G *et al.* Efficient storage of high throughput DNA sequencing data using reference-based compression. *Genome research* 2011; 21:734-740.
7. Genomes Project C, Abecasis GR, Auton A *et al.* An integrated map of genetic variation from 1,092 human genomes. *Nature* 2012; 491:56-65.
8. Genomes Project C, Abecasis GR, Altshuler D *et al.* A map of human genome variation from population-scale sequencing. *Nature* 2010; 467:1061-1073.
9. Severin J, Beal K, Vilella AJ *et al.* eHive: an artificial intelligence workflow system for genomic analysis. *BMC Bioinformatics* 2010; 11:240.
10. Tischler German L, Steven. biobambam: tools for read pair collation based algorithms on BAM files. *Source Code Biol Med* 2014; 9:13. doi:10.1186/1751-0473-9-13.
11. DePristo MA, Banks E, Poplin R *et al.* A framework for variation discovery and genotyping using next-generation DNA sequencing data. *Nature genetics* 2011; 43:491-498.
12. Mills RE, Pittard WS, Mullaney JM *et al.* Natural genetic variation caused by small insertions and deletions in the human genome. *Genome research* 2011; 21:830-839.
13. Zhao H, Sun Z, Wang J *et al.* CrossMap: a versatile tool for coordinate conversion between genome assemblies. *Bioinformatics* 2014; 30:1006-1007.
14. Skaletsky H, Kuroda-Kawaguchi T, Minx PJ *et al.* The male-specific region of the human Y chromosome is a mosaic of discrete sequence classes. *Nature* 2003; 423:825-837.

Table 1. Characteristics of the GRCh38 alignments. Some metrics are presented in comparison with the 1000 Genomes Project phase3 alignments to the GRCh37 assembly (numbers in parenthesis). Mapped coverage was calculated using a nominal 3 Gb genome size.

|                                   | Low coverage<br>WGS | WES             |
|-----------------------------------|---------------------|-----------------|
| <b>Sample count</b>               | 2691                | 2692            |
| <b>Total bases (Gbp)</b>          | 63,744              | 28,152          |
| <b>Total aligned bases (Gbp)</b>  | 66,437              | 30,901          |
| <b>Percentage mapped</b>          | 96.2 (92.6)         | 97.5 (93.6)     |
| <b>Percentage PCR duplicated</b>  | 3.6 (4.1)           | 11.9 (13.1)     |
| <b>Mapped coverage</b>            | 8.2 (7.8)           | 3.8 (3.5)       |
| <b>Mean target coverage</b>       | N/A                 | 101.09 (104.72) |
| <b>%target base 20X</b>           | N/A                 | 84.4 (87.24)    |
| <b>CRAM file size (terabytes)</b> | 21.2                | 9.3             |

Table 2. Comparison of GRCh37 and GRCh38 genome accessibility masks. N: bases that are "N"; L: accumulative read depth too low; H: accumulative read depth too high; Z: too many reads with mapping quality zero; Q: mapping quality less than cutoff; P: sites passed the accessibility test.

|                      | N     | L     | H     | Z      | Q     | P      |
|----------------------|-------|-------|-------|--------|-------|--------|
| <b>GRCh37-strict</b> | 7.66% | 1.13% | 0.55% | 17.20% | 2.98% | 70.49% |
| <b>GRCh37-pilot</b>  | 7.66% | 1.13% | 0.24% | 2.74%  |       | 88.23% |
| <b>GRCh38-strict</b> | 5.33% | 1.44% | 1.04% | 18.07% | 0.03% | 74.09% |
| <b>GRCh38-pilot</b>  | 5.33% | 1.44% | 0.56% | 3.67%  |       | 89.00% |

Figure 1. The alignment pipeline flow chart.

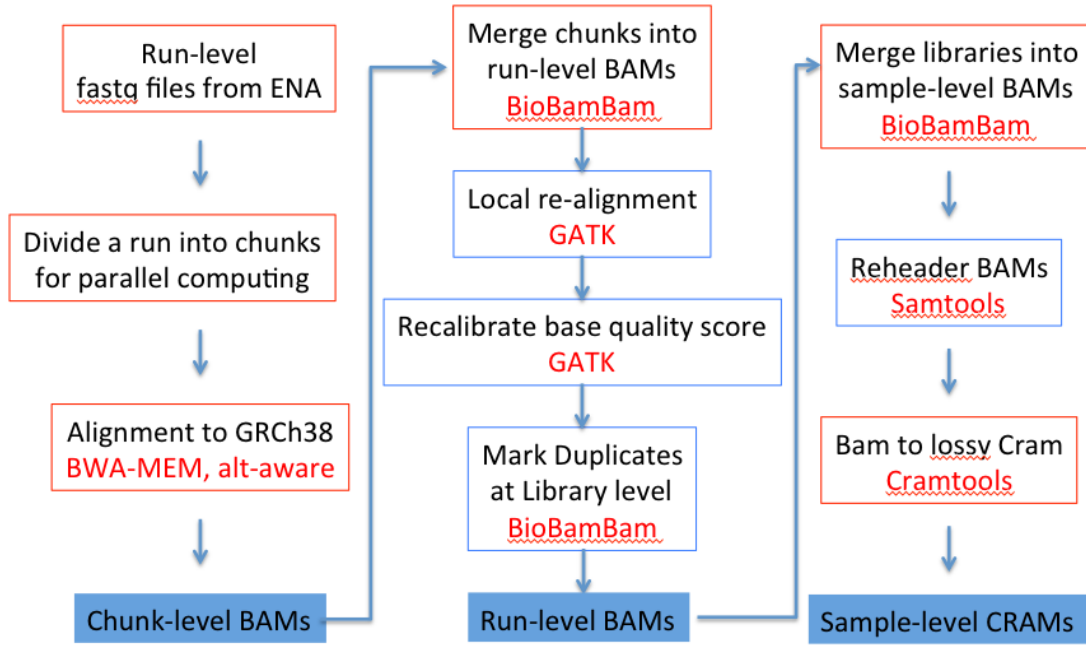

Figure 2. Measurements of mapping quality and total read depth by chromosome for the low coverage WGS sequence. A: Average mapping quality across all samples. B: Total read count per site with mapping quality of zero across all samples. C: Total read depth in all samples.

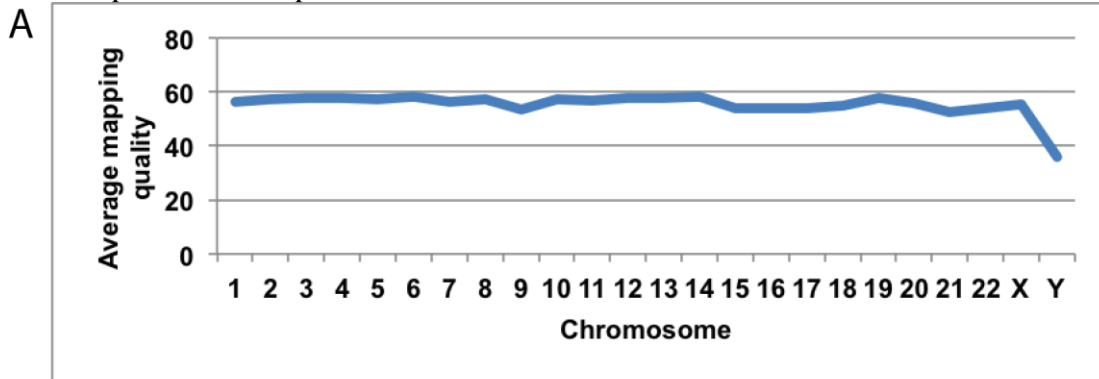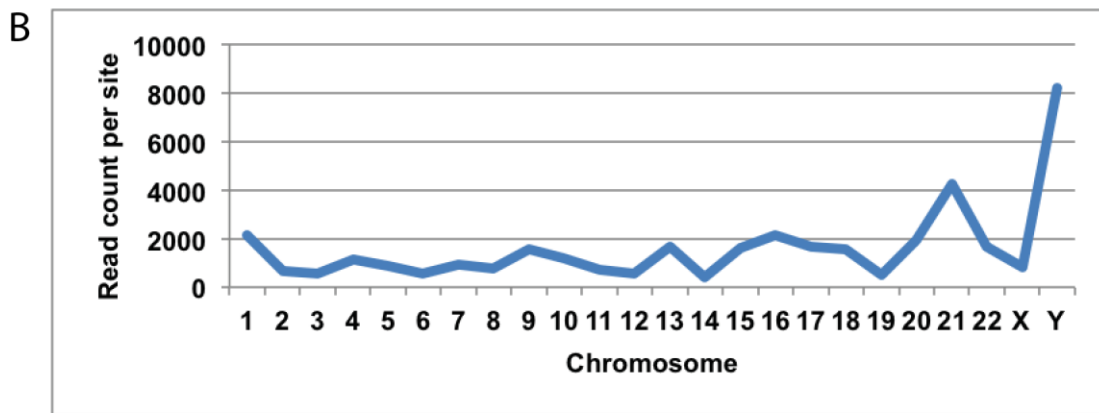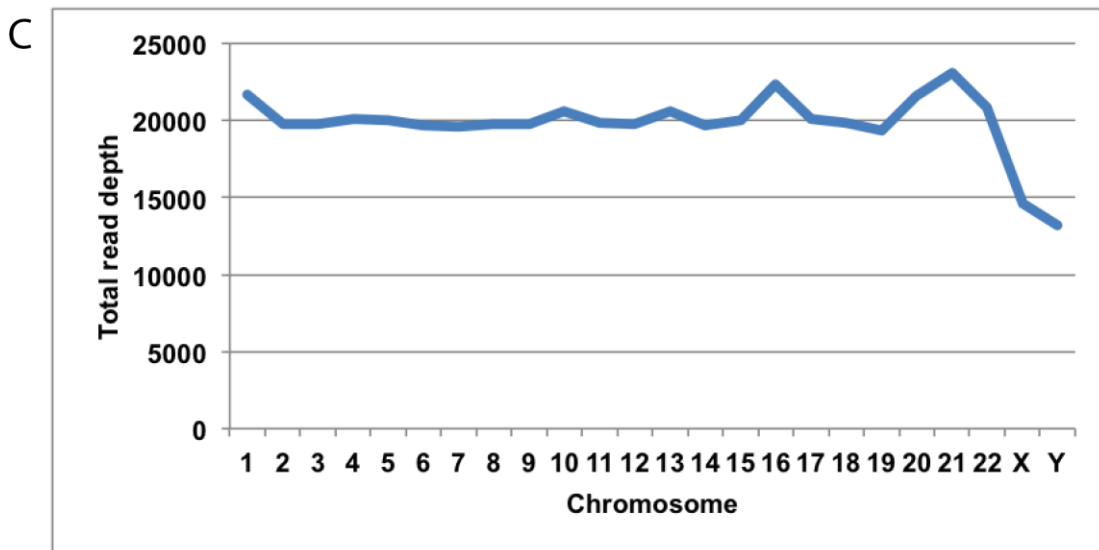

Figure 3. Percentage of sites on chromosome Y by total coverage showing the expected peak at approximately 5000x.

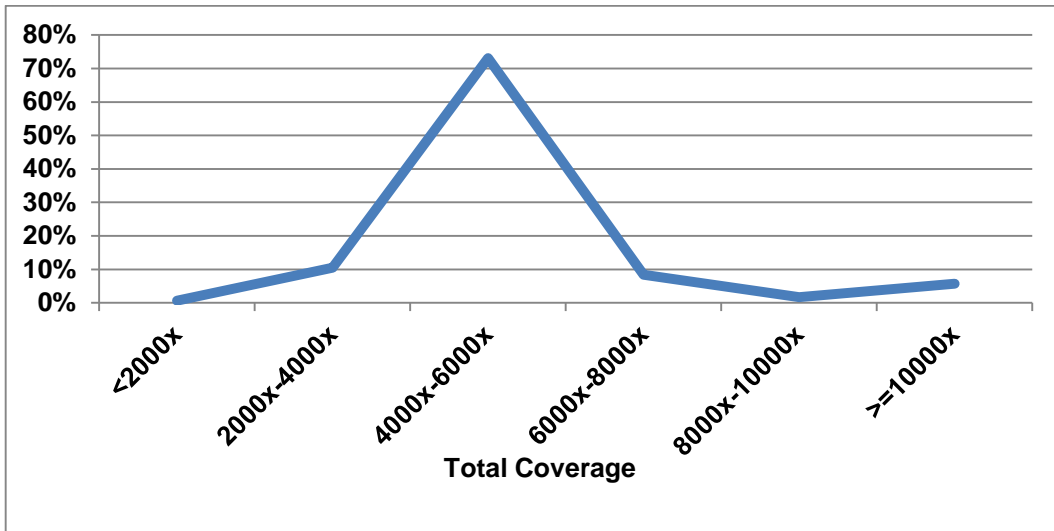



Click here to access/download

**Supplementary Material**

alignment\_1kg\_reads\_to\_GRCh38.supplementaltable1.t  
xt
